# Supplementary material for: A Rare and Easily Overlooked Case of Bilateral Traumatic Testicular Dislocation and an Alternative Viewpoint on Delayed Management
Source: MDPI journal article supplement (doi:10.3390/medicina59050892), 2023-05-06
Supplement: s1 [file s1]

Table S1: Histological findings of testes in nine cases

| Case | Authors   | Age | Mechanism           | Location           | Operation timing | Complications                          | Pathologic findings                                                 | Follow-up semen analysis          | Follow-up biopsy |
|------|-----------|-----|---------------------|--------------------|------------------|----------------------------------------|---------------------------------------------------------------------|-----------------------------------|------------------|
| 1    | Goulding  | 22  | Motorcycle accident | Right inguinal     | 2 months later   | Nil                                    | Absent nuclei of seminiferous tubules, no active spermatogenesis    | Nil                               | Nil              |
| 2    | Pollen    | 22  | Motorcycle accident | Bilateral inguinal | 8 weeks later    | Bilateral 180° rotation                | No active spermatogenesis                                           | Normal results 3 months later     | Nil              |
| 3    | Nakarajan | 25  | Motorcycle accident | Bilateral inguinal | 6 weeks later    | Nil                                    | Diffuse atrophy of the seminiferous tubules, absent sperm formation | Nil                               | Nil              |
| 4    | Koga      | 17  | Motorcycle accident | Right inguinal     | 2 days later     | Nil                                    | Normal findings                                                     | Nil                               | Nil              |
| 5    | Lee       | 23  | Motorcycle accident | Right inguinal     | 3 months later   | Intraperitoneal rupture of the bladder | Hypospermatogenesis with increased Sertoli cells                    | Oligoasthenospermia 1 month later | Nil              |

|   |           |    |                       |                    |                |                                     |                                                                  |                                                                |                                                  |
|---|-----------|----|-----------------------|--------------------|----------------|-------------------------------------|------------------------------------------------------------------|----------------------------------------------------------------|--------------------------------------------------|
| 6 | Hayami    | 17 | Car collision         | Right inguinal     | 4 months later | 180° rotation                       | Severe impairment in spermatogenesis                             | Asthenospermia 6 months later                                  | Spermatogenesis slightly improved 8 months later |
| 7 | Yagi      | 25 | Fishing boat accident | Left thigh         | 3 weeks later  | 180° rotation with slightly torsion | Arrest of spermatogenesis                                        | Nil                                                            | Nil                                              |
| 8 | Yoshimura | 30 | Motorcycle accident   | Bilateral inguinal | 13 years later | Atrophic, bilateral 180° rotation   | Severe hypospermatogenesis; Semen azoospermia                    | Oligospermia improved after 10 months; partner became pregnant | Nil                                              |
| 9 | Sakamoto  | 33 | Motorcycle accident   | Bilateral inguinal | 15 years later | Atrophic, bilateral 180° rotation   | Maturation arrest at the primary spermatocyte; Semen azoospermia | Normal results 10 months later; spontaneous pregnancy later    | Nil                                              |
